# Supplementary material for: Stationary phase effects in hydrophilic interaction liquid chromatographic separation of oligonucleotides
Source: Royal Society of Chemistry journal article supplement (doi:10.1039/d4an01155d), 2024-11-25
Supplement: d4an01155d1.pdf [file d4an01155d1.pdf]

## Supplemental Information

### Stationary Phase Effects in Hydrophilic Interaction Liquid Chromatographic Separation of Oligonucleotides

Scott Abernathy, Asif Rayhan, and Patrick A. Limbach\*

Rieveschl Laboratories for Mass Spectrometry, Department of Chemistry, University of Cincinnati,  
PO Box 210172, Cincinnati, Ohio 45221-0172, United States

\*To whom correspondence should be addressed.

Phone (513) 558-0026

Fax (513) 556-9239

Email [Pat.Limbach@uc.edu](mailto:Pat.Limbach@uc.edu)

#### Supplemental Information Provided:

Tables S1-S3

Figures S1-S6

**Supplemental Table S1.** Molecular weight (MW) and electrospray series values for tRNA<sup>Phe</sup> from yeast for the digestion products of just RNase T1 and RNase T1 with bacterial alkaline phosphatase (BAP). Values only reported that align with the scan range employed for mass spectrometry (600Da-2000Da).

| <b>RNase T1 Dig. Products</b>             | <b>MW</b> | <b>-1</b> | <b>-2</b> | <b>-3</b> | <b>-4</b> | <b>-5</b> |
|-------------------------------------------|-----------|-----------|-----------|-----------|-----------|-----------|
| CGp                                       | 668.4     | 667.4     |           |           |           |           |
| UGp                                       | 669.4     | 668.4     |           |           |           |           |
| AGp                                       | 692.4     | 691.4     |           |           |           |           |
| DDGp                                      | 979.6     | 978.6     |           |           |           |           |
| [m <sup>5</sup> U]ΨCGp                    | 1294.8    | 1293.8    | 646.4     |           |           |           |
| CCAGp                                     | 1302.8    | 1301.8    | 650.4     |           |           |           |
| CACCA                                     | 1512.0    | 1511.0    | 755.0     |           |           |           |
| CUCAGp                                    | 1609.0    | 1608.0    | 803.5     |           |           |           |
| AAUUCGp                                   | 1939.2    | 1938.2    | 968.6     | 645.4     |           |           |
| AUUUA[m <sup>2</sup> G]p                  | 1954.2    | 1953.2    | 976.1     | 650.4     |           |           |
| [m <sup>7</sup> G]UC[m <sup>5</sup> C]UGp | 1959.2    | 1958.2    | 978.6     | 652.1     |           |           |
| [m <sup>1</sup> A]UCCACAGp                | 2586.6    |           | 1292.3    | 861.2     | 645.6     |           |
| A[Cm]U[Gm]AA[yW]AΨ[m <sup>5</sup> C]UGp   | 4166.7    |           |           | 1387.9    | 1040.7    | 832.3     |
| <b>RNase T1 + BAP Dig. Products</b>       | <b>MW</b> | <b>-1</b> | <b>-2</b> | <b>-3</b> | <b>-4</b> | <b>-5</b> |
| CG                                        | 588.4     | 587.4     |           |           |           |           |
| UG                                        | 589.4     | 588.4     |           |           |           |           |
| AG                                        | 612.5     | 611.4     |           |           |           |           |
| DDG                                       | 899.6     | 898.6     |           |           |           |           |
| [m <sup>5</sup> U]ΨCG                     | 1214.8    | 1213.8    | 606.4     |           |           |           |
| CCAG                                      | 1222.8    | 1221.8    | 610.4     |           |           |           |
| CACCA                                     | 1512.0    | 1511.0    | 755.0     |           |           |           |
| CUCAG                                     | 1529.0    | 1528.0    | 763.5     |           |           |           |
| AAUUCG                                    | 1859.2    | 1858.2    | 928.6     | 618.7     |           |           |
| AUUUA[m <sup>2</sup> G]                   | 1874.2    | 1873.2    | 936.1     | 623.7     |           |           |
| [m <sup>7</sup> G]UC[m <sup>5</sup> C]UG  | 1879.2    | 1878.2    | 938.6     | 625.4     |           |           |
| [m <sup>1</sup> A]UCCACAG                 | 2506.6    |           | 1252.3    | 834.5     | 625.6     |           |
| A[Cm]U[Gm]AA[yW]AΨ[m <sup>5</sup> C]UG    | 4086.7    |           |           | 1361.2    | 1020.7    | 816.3     |

**Supplemental Table S2.** Chromatographic Figures of Merit for the comparison of the five HILIC columns that perform best for the LC-MS analysis of tRNA<sup>Phe</sup> RNase T1 digestion products. 4 µg of digest was injected. Digestion products were identified through extracted ion chromatograms (EICs) of the most abundant charge state and each was confirmed by MS/MS sequence data. If no figures of merit are listed, then the RNase T1 digestion product was not detected in the LC-MS/MS data. Figures of merit reported are retention factor ( $k'$ ), resolution (R), Peak Capacity ( $P_c$ ), peak symmetry (S), and peak width at half height ( $w_{1/2}$ ).

**Waters BEH Amide**

| Digestion Product                         | Retention Factor ( $k'$ ) | Resolution (R) | Peak Capacity ( $P_c$ ) | Symmetry (S) | $w_{1/2}$ (min) |
|-------------------------------------------|---------------------------|----------------|-------------------------|--------------|-----------------|
| CGp                                       | 4.2                       | 0.2            | 104                     | 2.0          | 0.2             |
| UGp                                       | 4.2                       | 0.0            | 104                     | 2.0          | 0.2             |
| AGp                                       | 4.1                       | ---            | 53                      | 2.0          | 0.4             |
| DDGp                                      | 7.0                       | 6.7            | 53                      | 0.7          | 0.4             |
| [m <sup>5</sup> U]ΨCGp                    | 10.6                      | 4.0            | 53                      | 1.7          | 0.4             |
| CCAGp                                     | 10.7                      | 0.1            | 53                      | 1.7          | 0.4             |
| CACCA                                     | 8.3                       | 2.4            | 53                      | 1.0          | 0.4             |
| CUCAGp                                    | 12.3                      | 1.0            | 70                      | 2.0          | 0.3             |
| AAUUCGp                                   | 13.1                      | 1.5            | 53                      | 2.5          | 0.4             |
| AUUUA[m <sup>2</sup> G]p                  | 11.9                      | 2.5            | 70                      | 2.0          | 0.3             |
| [m <sup>7</sup> G]UC[m <sup>5</sup> C]UGp | 14.7                      | 2.8            | 53                      | 1.3          | 0.4             |
| [m <sup>1</sup> A]UCCACAGp                | 15.7                      | 1.9            | 60                      | 2.0          | 0.35            |
| A[Cm]U[Gm]AA[yW]AΨ[m <sup>5</sup> C]UGp   | 15.7                      | 0.0            | 60                      | 2.0          | 0.35            |

### Shodex VN-50

| Digestion Product                         | Retention Factor (k') | Resolution (R) | Peak Capacity (P <sub>c</sub> ) | Symmetry (S) | W <sub>1/2</sub> (min) |
|-------------------------------------------|-----------------------|----------------|---------------------------------|--------------|------------------------|
| CGp                                       | 3.0                   | 0.4            | 53                              | 1.6          | 0.4                    |
| UGp                                       | 2.3                   | ---            | 53                              | 1.3          | 0.4                    |
| AGp                                       | 2.7                   | 0.6            | 35                              | 1.6          | 0.6                    |
| DDGp                                      | 3.1                   | 0.1            | 35                              | 1.6          | 0.6                    |
| [m <sup>5</sup> U]ΨCGp                    | 6.0                   | 3.4            | 35                              | 1.4          | 0.6                    |
| CCAGp                                     | 7.6                   | 1.7            | 35                              | 1.6          | 0.6                    |
| CACCA                                     | 6.2                   | 0.2            | 35                              | 1.4          | 0.6                    |
| CUCAGp                                    | 9.1                   | 2.6            | 104                             | 2.0          | 0.2                    |
| AAUUCGp                                   | 10.4                  | 0.3            | 35                              | 1.6          | 0.6                    |
| AUUUA[m <sup>2</sup> G]p                  | 9.1                   | 0.2            | 104                             | 2.0          | 0.2                    |
| [m <sup>7</sup> G]UC[m <sup>5</sup> C]UGp | 10.1                  | 1.9            | 35                              | 1.6          | 0.6                    |
| [m <sup>1</sup> A]UCCACAGp                | 12.8                  | 3.7            | 70                              | 2.0          | 0.3                    |
| A[Cm]U[Gm]AA[yW]AΨ[m <sup>5</sup> C]UGp   | 13.7                  | 2.3            | 70                              | 1.3          | 0.3                    |

### Waters Torus Diol

| Digestion Product                         | Retention Factor (k') | Resolution (R) | Peak Capacity (P <sub>c</sub> ) | Symmetry (S) | w <sub>1/2</sub> (min) |
|-------------------------------------------|-----------------------|----------------|---------------------------------|--------------|------------------------|
| CGp                                       | 3.1                   | 0.3            | 42                              | 1.5          | 0.5                    |
| UGp                                       | 2.6                   | ---            | 42                              | 1.0          | 0.5                    |
| AGp                                       | 2.9                   | 0.4            | 35                              | 3.0          | 0.6                    |
| DDGp                                      | 3.8                   | 0.9            | 42                              | 1.0          | 0.5                    |
| [m <sup>5</sup> U]ΨCGp                    | 5.6                   | 0.2            | 35                              | 2.0          | 0.6                    |
| CCAGp                                     | 7.2                   | 1.8            | 35                              | 1.8          | 0.6                    |
| CACCA                                     | 5.4                   | 2.2            | 35                              | 2.0          | 0.6                    |
| CUCAGp                                    | 8.6                   | 1.5            | 30                              | 2.0          | 0.7                    |
| AAUUCGp                                   | 10.0                  | 1.3            | 30                              | 1.6          | 0.7                    |
| AUUUA[m <sup>2</sup> G]p                  | 8.7                   | 0.1            | 30                              | 2.0          | 0.7                    |
| [m <sup>7</sup> G]UC[m <sup>5</sup> C]UGp | 10.0                  | 0.0            | 30                              | 1.6          | 0.7                    |
| [m <sup>1</sup> A]UCCACAGp                | 13.0                  | 3.5            | 42                              | 2.0          | 0.5                    |
| A[Cm]U[Gm]AA[yW]AΨ[m <sup>5</sup> C]UGp   | 14.5                  | 2.0            | 35                              | 2.3          | 0.6                    |

### Hilicon iHILIC-Fusion

| Digestion Product                         | Retention Factor (k') | Resolution (R) | Peak Capacity (P <sub>c</sub> ) | Symmetry (S) | w <sub>1/2</sub> (min) |
|-------------------------------------------|-----------------------|----------------|---------------------------------|--------------|------------------------|
| CGp                                       | 2.1                   | ---            | 104                             | 1.0          | 0.2                    |
| UGp                                       | 2.1                   | 0.0            | 104                             | 1.0          | 0.2                    |
| AGp                                       | 2.3                   | 0.6            | 70                              | 1.0          | 0.3                    |
| DDGp                                      | 2.5                   | 0.4            | 53                              | 1.0          | 0.4                    |
| [m <sup>5</sup> U]ΨCGp                    | 4.6                   | 3.4            | 53                              | 1.3          | 0.4                    |
| CCAGp                                     | 5.2                   | 0.7            | 35                              | 1.3          | 0.6                    |
| CACCA                                     | 3.2                   | 1.6            | 104                             | 1.0          | 0.2                    |
| CUCAGp                                    | 7.5                   | 1.7            | 70                              | 1.7          | 0.3                    |
| AAUUCGp                                   | 8.0                   | 1.2            | 70                              | 1.3          | 0.3                    |
| AUUUA[m <sup>2</sup> G]p                  | 6.5                   | 1.8            | 42                              | 1.4          | 0.5                    |
| [m <sup>7</sup> G]UC[m <sup>5</sup> C]UGp | 9.6                   | 3.9            | 70                              | 1.3          | 0.3                    |
| [m <sup>1</sup> A]UCCACAGp                | 11.4                  | 5.1            | 104                             | 1.3          | 0.2                    |
| A[Cm]U[Gm]AA[yW]AΨ[m <sup>5</sup> C]UGp   | 11.5                  | 0.2            | 104                             | 1.3          |                        |

### Waters BEH Z-HILIC

| Digestion Product                         | Retention Factor (k') | Resolution (R) | Peak Capacity (P <sub>c</sub> ) | Symmetry (S) | w <sub>1/2</sub> (min) |
|-------------------------------------------|-----------------------|----------------|---------------------------------|--------------|------------------------|
| CGp                                       | 10.1                  | 0.0            | 35                              | 1.5          | 0.6                    |
| UGp                                       | 10.1                  | 1.2            | 35                              | 1.5          | 0.6                    |
| AGp                                       | 9.1                   | ---            | 35                              | 0.7          | 0.6                    |
| DDGp                                      | 13.4                  | 4.7            | 53                              | 2.0          | 0.4                    |
| [m <sup>5</sup> U]ΨCGp                    | 17.9                  | 6.7            | 42                              | 1.0          | 0.5                    |
| CCAGp                                     | 19.3                  | 1.9            | 42                              | 1.0          | 0.5                    |
| CACCA                                     | 14.2                  | 1.5            | 70                              | 0.5          | 0.3                    |
| CUCAGp                                    | 22.9                  | 0.1            | 22                              | 1.3          | 1                      |
| AAUUCGp                                   | 25.6                  | 0.9            | 22                              | 1.3          | 1                      |
| AUUUA[m <sup>2</sup> G]p                  | 22.8                  | 3.8            | 27                              | 1.3          | 0.8                    |
| [m <sup>7</sup> G]UC[m <sup>5</sup> C]UGp | 24.3                  | 1.0            | 22                              | 1.3          | 1                      |
| [m <sup>1</sup> A]UCCACAGp                | 31.9                  | 3.0            | 11                              | 1.3          | 2                      |
| A[Cm]U[Gm]AA[yW]AΨ[m <sup>5</sup> C]UGp   | ND                    | ND             | ND                              | ND           | ND                     |

**Supplemental Table S3.** Retention factors for RNase T1 digestion products of *S. cerevisiae* tRNA-Phe after treatment with bacterial alkaline phosphatase. 4 µg of digest was injected. Digestion products were identified through extracted ion chromatograms (EICs) of the most abundant charge state and each was confirmed by MS/MS sequence data. If no retention factor is listed, then the RNase T1 digestion product was not detected in the LC-MS/MS data.

| Yeast tRNA <sup>Phe</sup> RNase T1 +<br>BAP Digestion products | Waters<br>BEH<br>amide | Shodex<br>VN-50 | Waters<br>Torus Diol | HILICON<br>iHILIC-<br>Fusion | Waters<br>BEH Z-<br>HILIC | HILICON<br>iHILIC-<br>Fusion+ | Waters<br>Torus 2-<br>PIC |
|----------------------------------------------------------------|------------------------|-----------------|----------------------|------------------------------|---------------------------|-------------------------------|---------------------------|
| AG                                                             | 3.1                    | ---             | 3.0                  | 2.3                          | 4.3                       | 2.6                           | 4.2                       |
| DDG                                                            | 3.8                    | ---             | 3.2                  | 2.5                          | 8.9                       | 3.6                           | 6.9                       |
| [m <sup>5</sup> U]ΨCG                                          | 7.0                    | 4.5             | 4.6                  | 3.4                          | 15.2                      | 8.4                           | 16.9                      |
| CCAG                                                           | 7.3                    | 5.7             | 5.0                  | 3.6                          | 16.7                      | 10.7                          | 18.3                      |
| CACCA                                                          | 8.8                    | 7.9             | 7.2                  | 4.8                          | 17.9                      | 14.9                          | 27.8                      |
| CUCAG                                                          | 10.0                   | 9.0             | 6.4                  | 4.4                          | 19.3                      | 14.1                          | 27.9                      |
| AAUUCG                                                         | 11.9                   | 10.7            | 9.0                  | 7.5                          | 21.6                      | 19.9                          | ---                       |
| AUUUA[m <sup>2</sup> G]                                        | 8.9                    | 10.5            | 7.1                  | 4.3                          | 19.0                      | 19.7                          | ---                       |
| [m <sup>7</sup> G]UC[m <sup>5</sup> C]UG                       | 14.4                   | 9.8             | 9.1                  | 9.1                          | 22.4                      | 19.9                          | ---                       |
| [m <sup>1</sup> A]UCCACAG                                      | 16.1                   | 14.8            | 14.3                 | 12.4                         | 28.4                      | ---                           | ---                       |
| A[Cm]U[Gm]AA[yW]AΨ[m <sup>5</sup> C]UG                         | 16.1                   | 16.1            | 16.5                 | 13.3                         | ---                       | ---                           | ---                       |

\*CG and UG were below the scan range set at 600 *m/z*

Polarity of stationary phase ligand and analytes

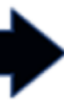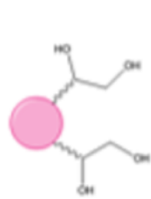

Shodex VN-50

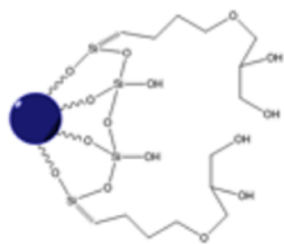

Waters  
Torus DIOL

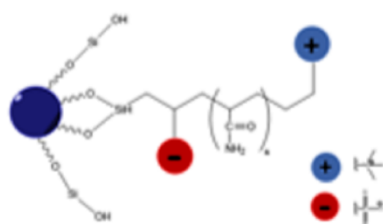

HILICON  
fusion

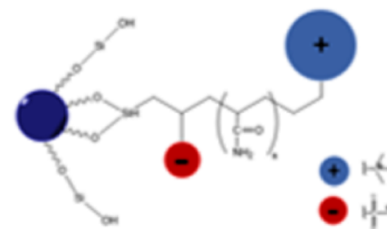

HILICON  
fusion (+)

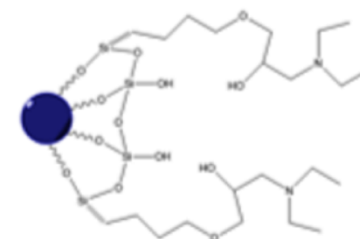

Waters  
Torus DEA

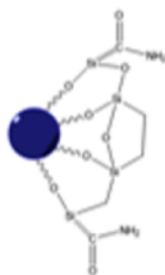

Waters BEH  
Amide

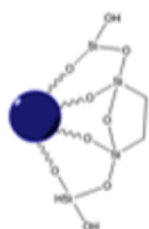

Waters BEH  
HILIC

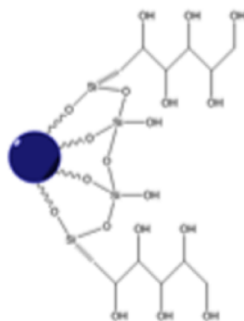

ACE HILIC-N

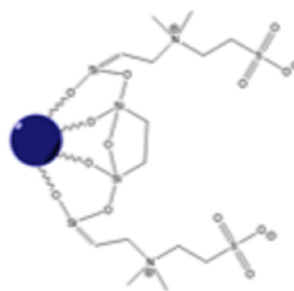

Waters BEH  
Z-HILIC

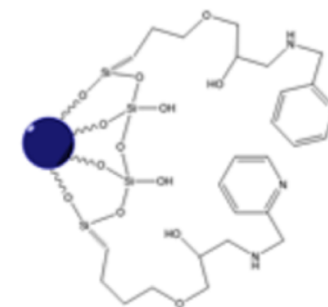

Waters  
Torus 2-pic

**Supplemental Figure S1.** Visual depiction of bonded phases of each column from Table 1. Dashed bonds represent a proprietary linker to affix the bonded phase to the particle. Blue particles are silica-based, and the pink particle is polymer-based.

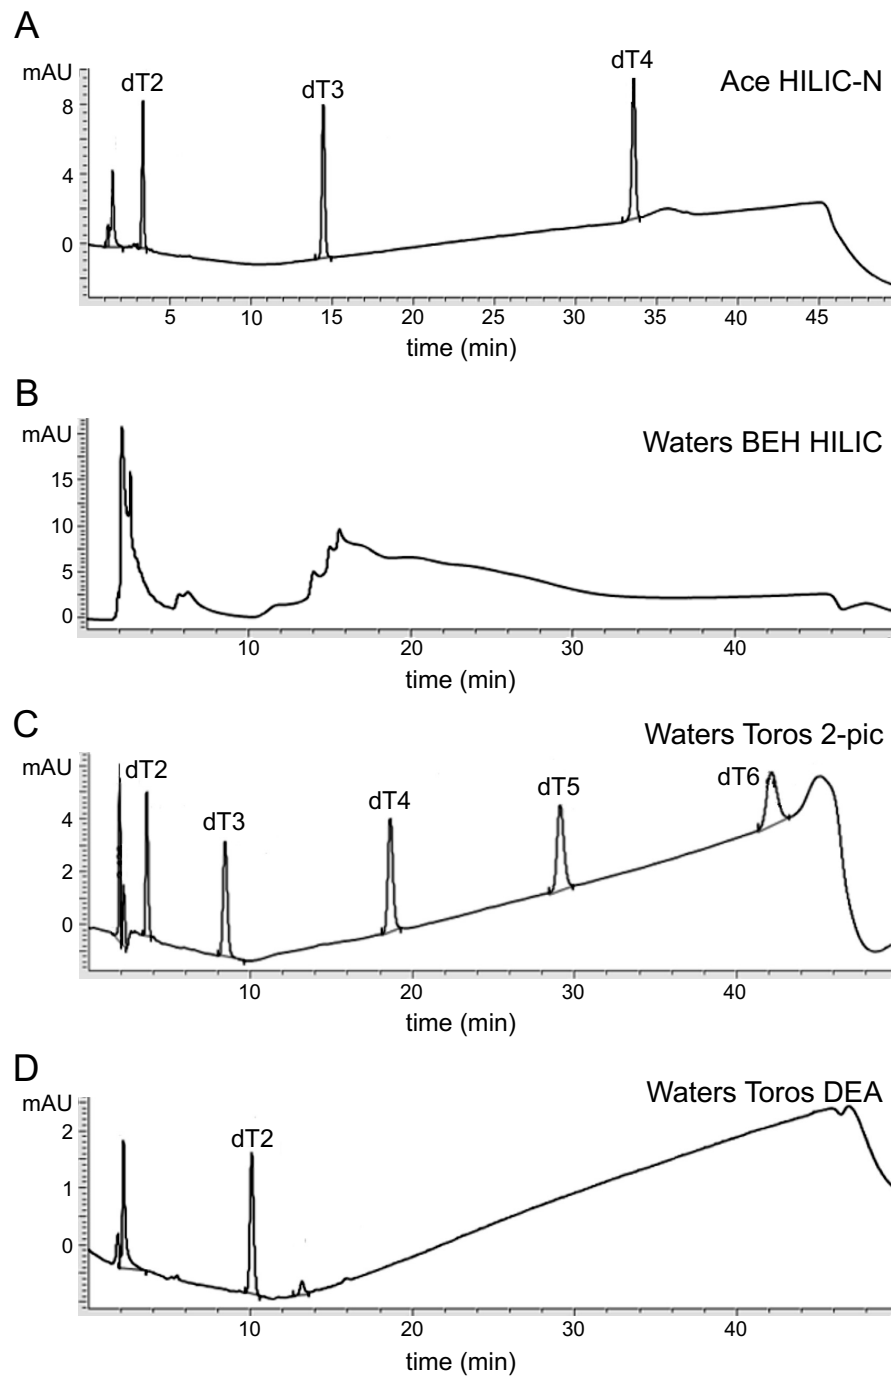

**Supplemental Figure S2.** LC-UV chromatograms showing separation of poly dTs by **(A)** Ace HILIC-N, **(B)** Waters BEH HILIC, **(C)** Waters Toros 2-pic, and **(D)** Waters Toros DEA columns. Under the conditions studied here, none of these alternative stationary phase chemistries are effective at the separation of longer oligonucleotides.



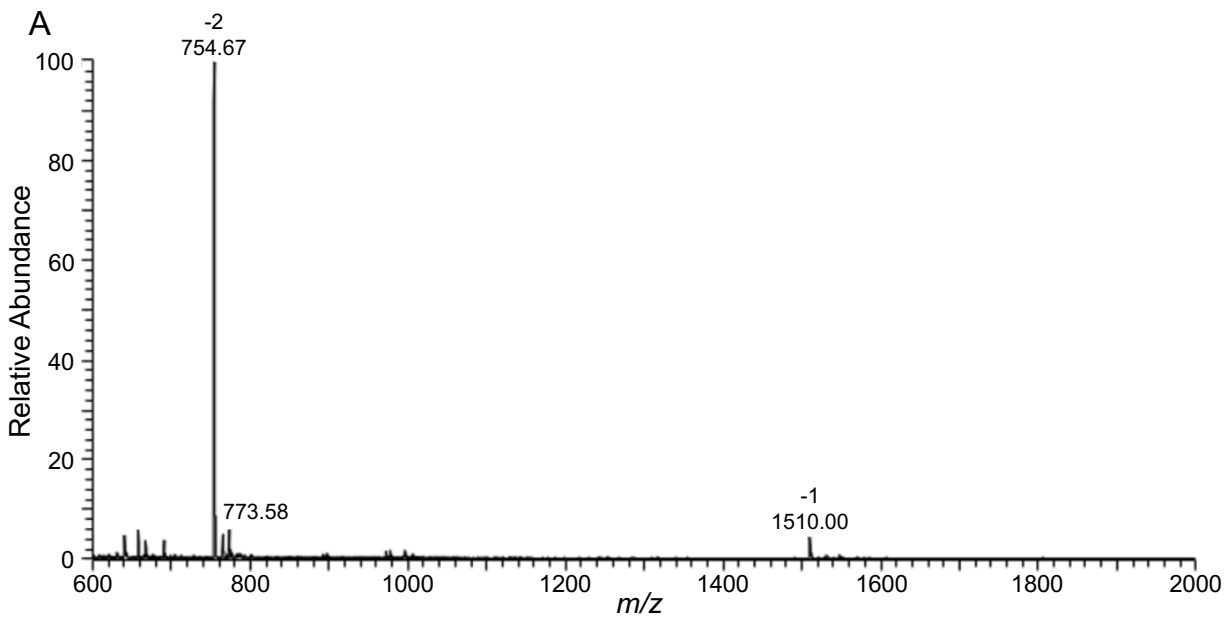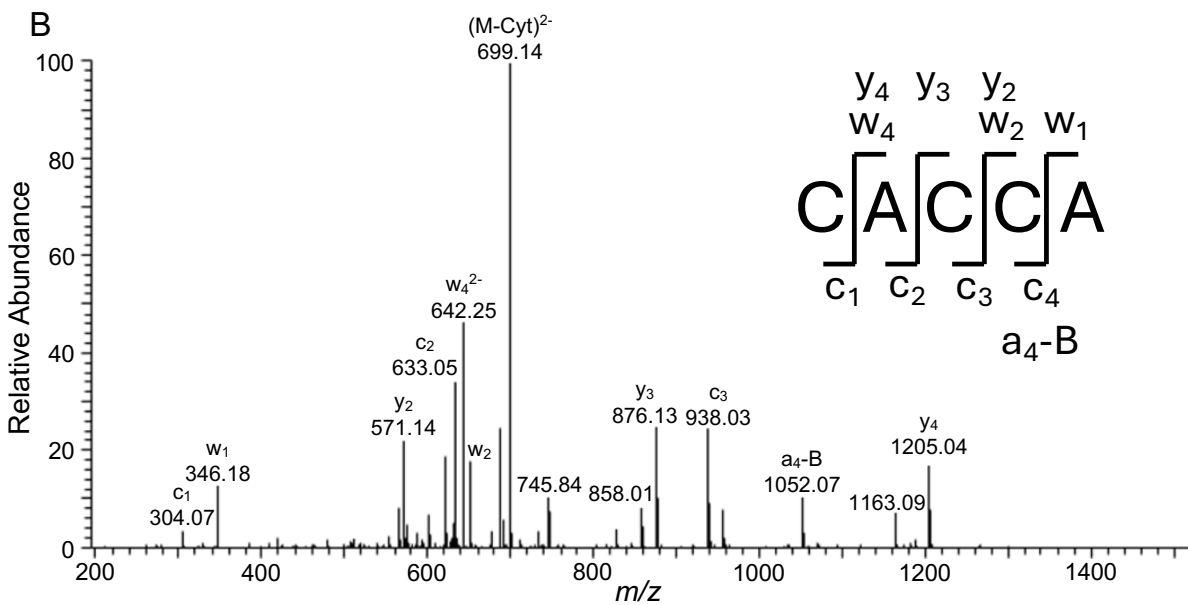

**Supplemental Figure S3.** (A) Mass spectrum of the RNase T1 digestion product CACCA, which elutes at 11.2 min from the Waters BEH Amide column (Figure 5A). (B) The MS/MS spectrum resulting from collision-induced dissociation of the -2 charge state. The fragmentation notation confirming this sequence is shown in the inset.

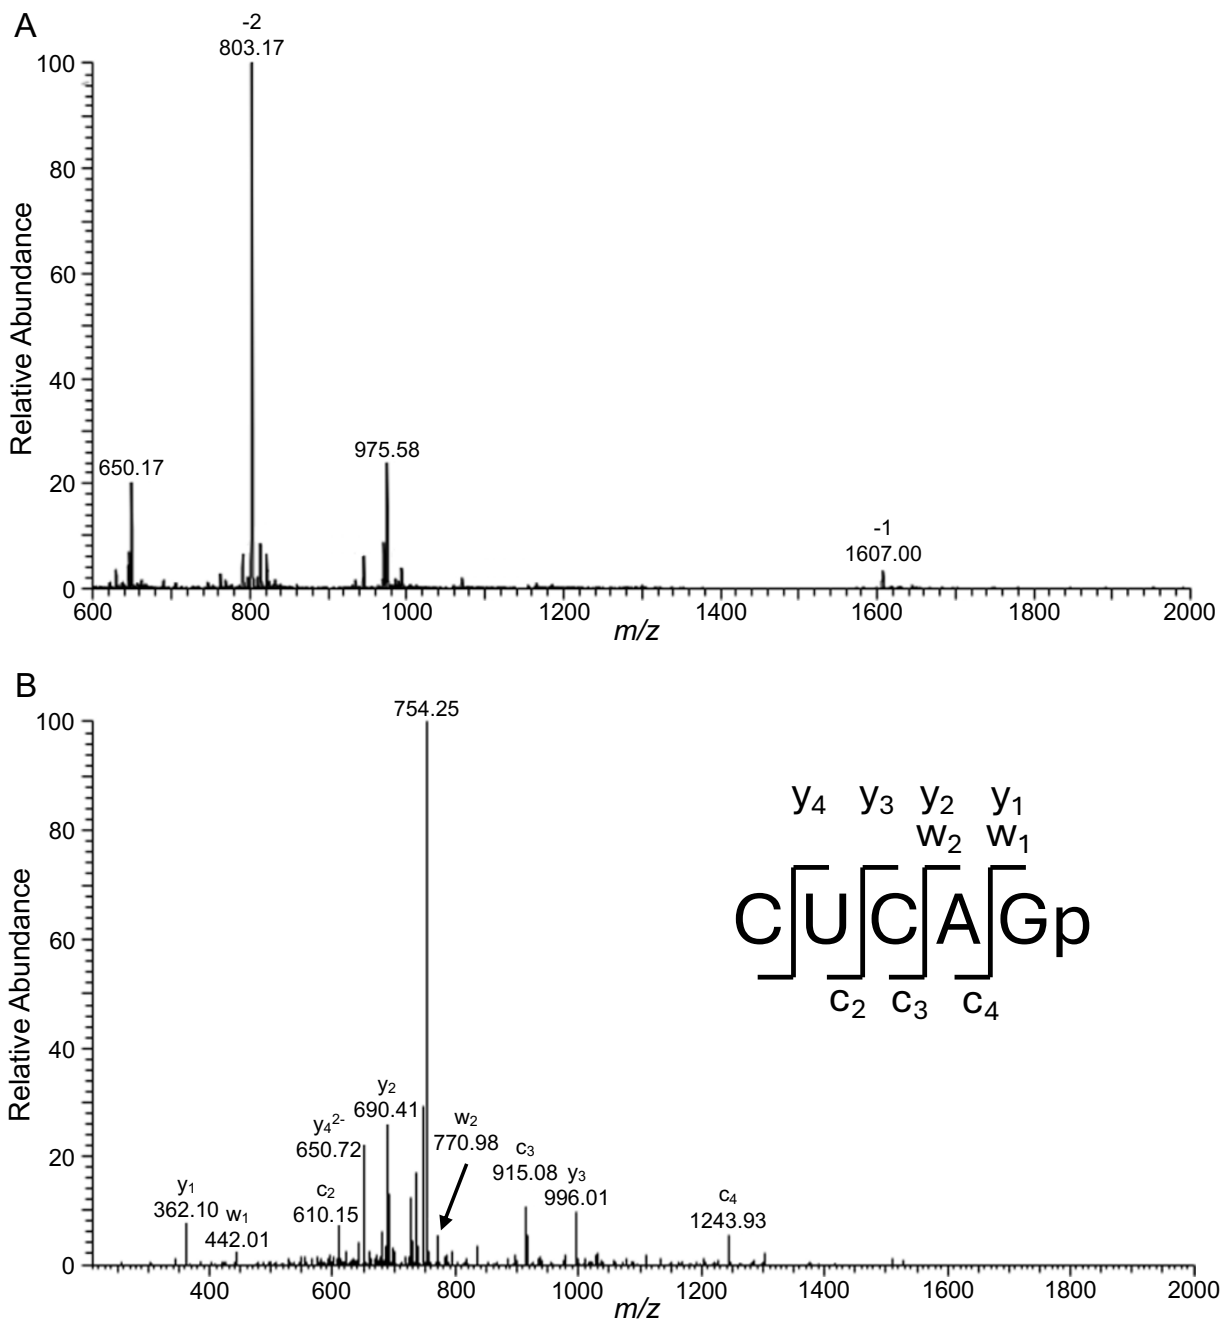

**Supplemental Figure S4.** (A) Mass spectrum of the RNase T1 digestion product CUCAGp, which elutes at 16 min from the Waters BEH Amide column (Figure 5A). (B) The MS/MS spectrum resulting from collision-induced dissociation of the -2 charge state. The fragmentation notation confirming this sequence is shown in the inset.

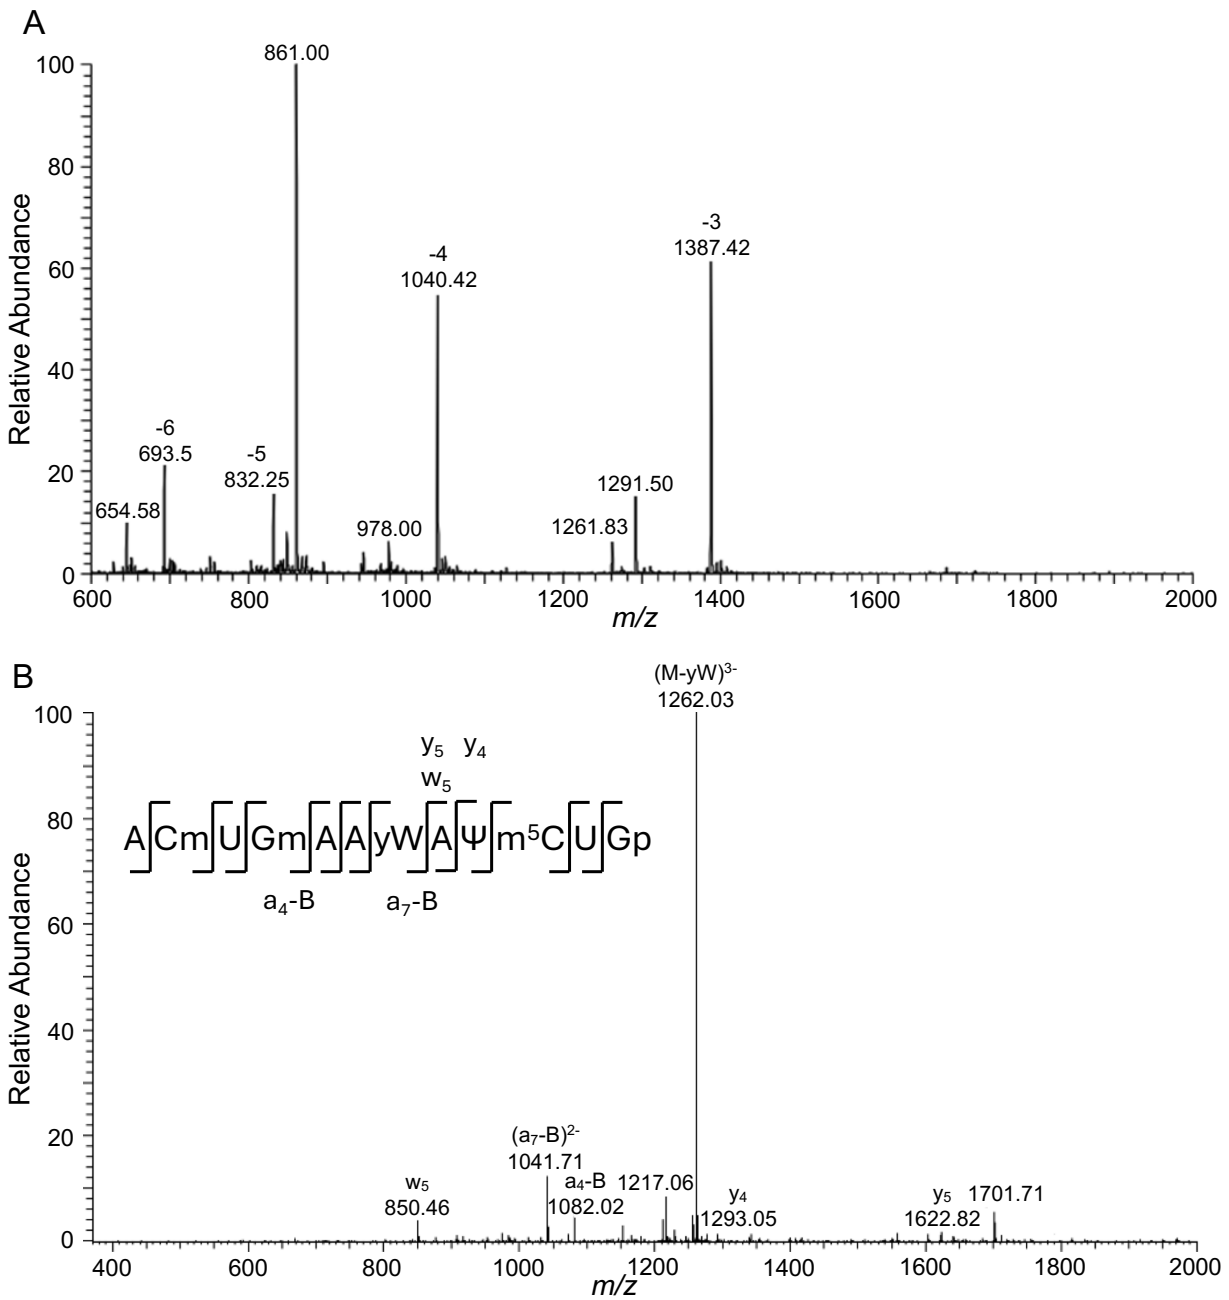

**Supplemental Figure S5. (A)** Mass spectrum of the RNase T1 digestion product

A[Cm]U[Gm]AA[yW]A[Ψ][m<sup>5</sup>C]UGp, which elutes at 20 min from the Waters BEH Amide column

(**Figure 5A**). (**B**) The MS/MS spectrum resulting from collision-induced dissociation of the -3

charge state. The fragmentation notation assigned to this sequence is shown in the inset.

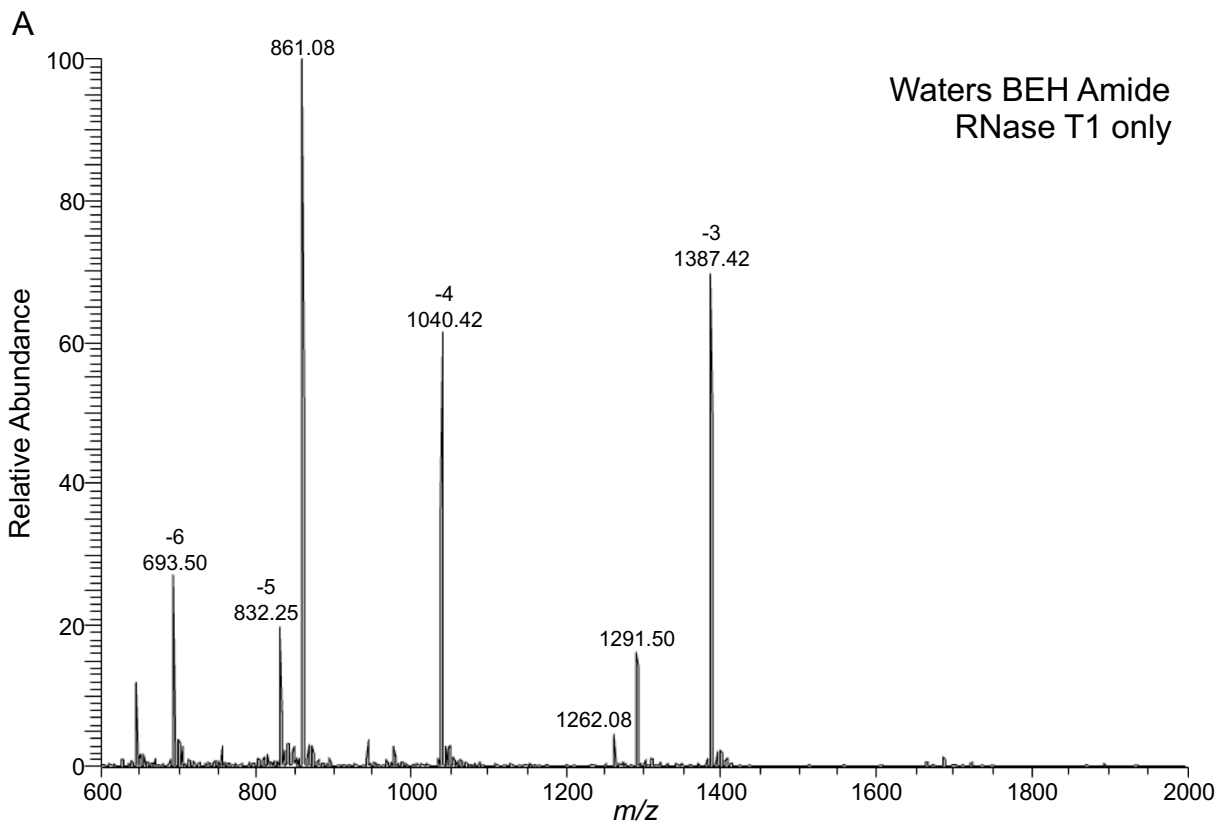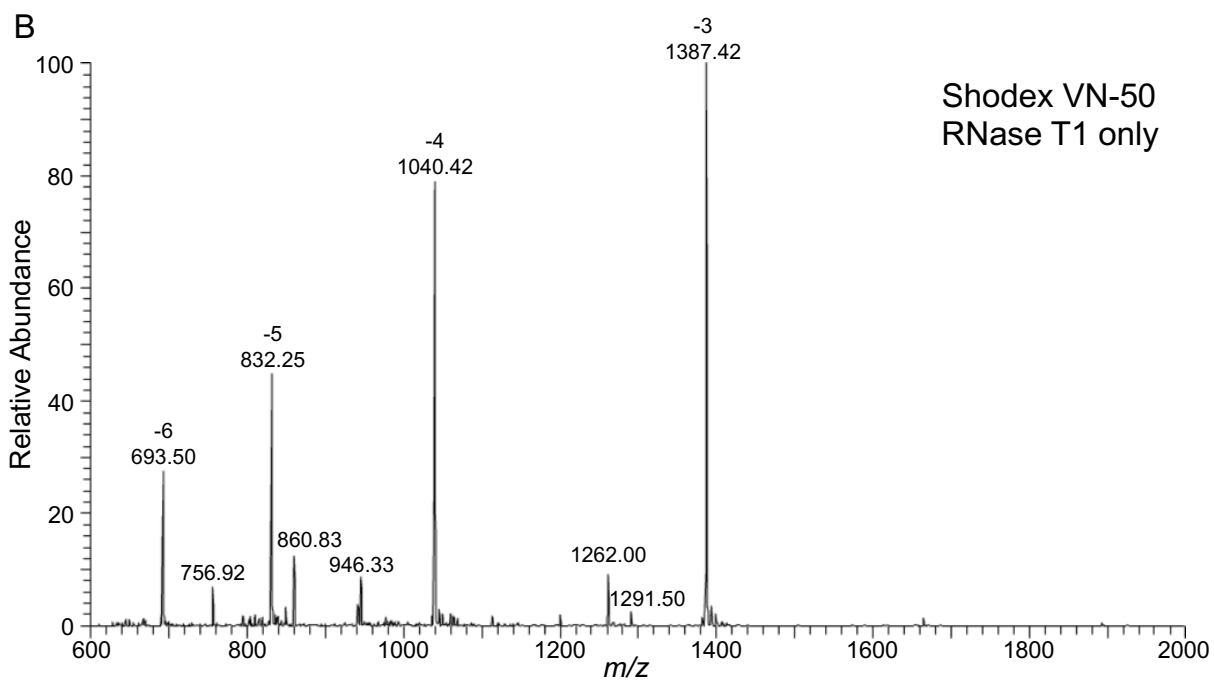

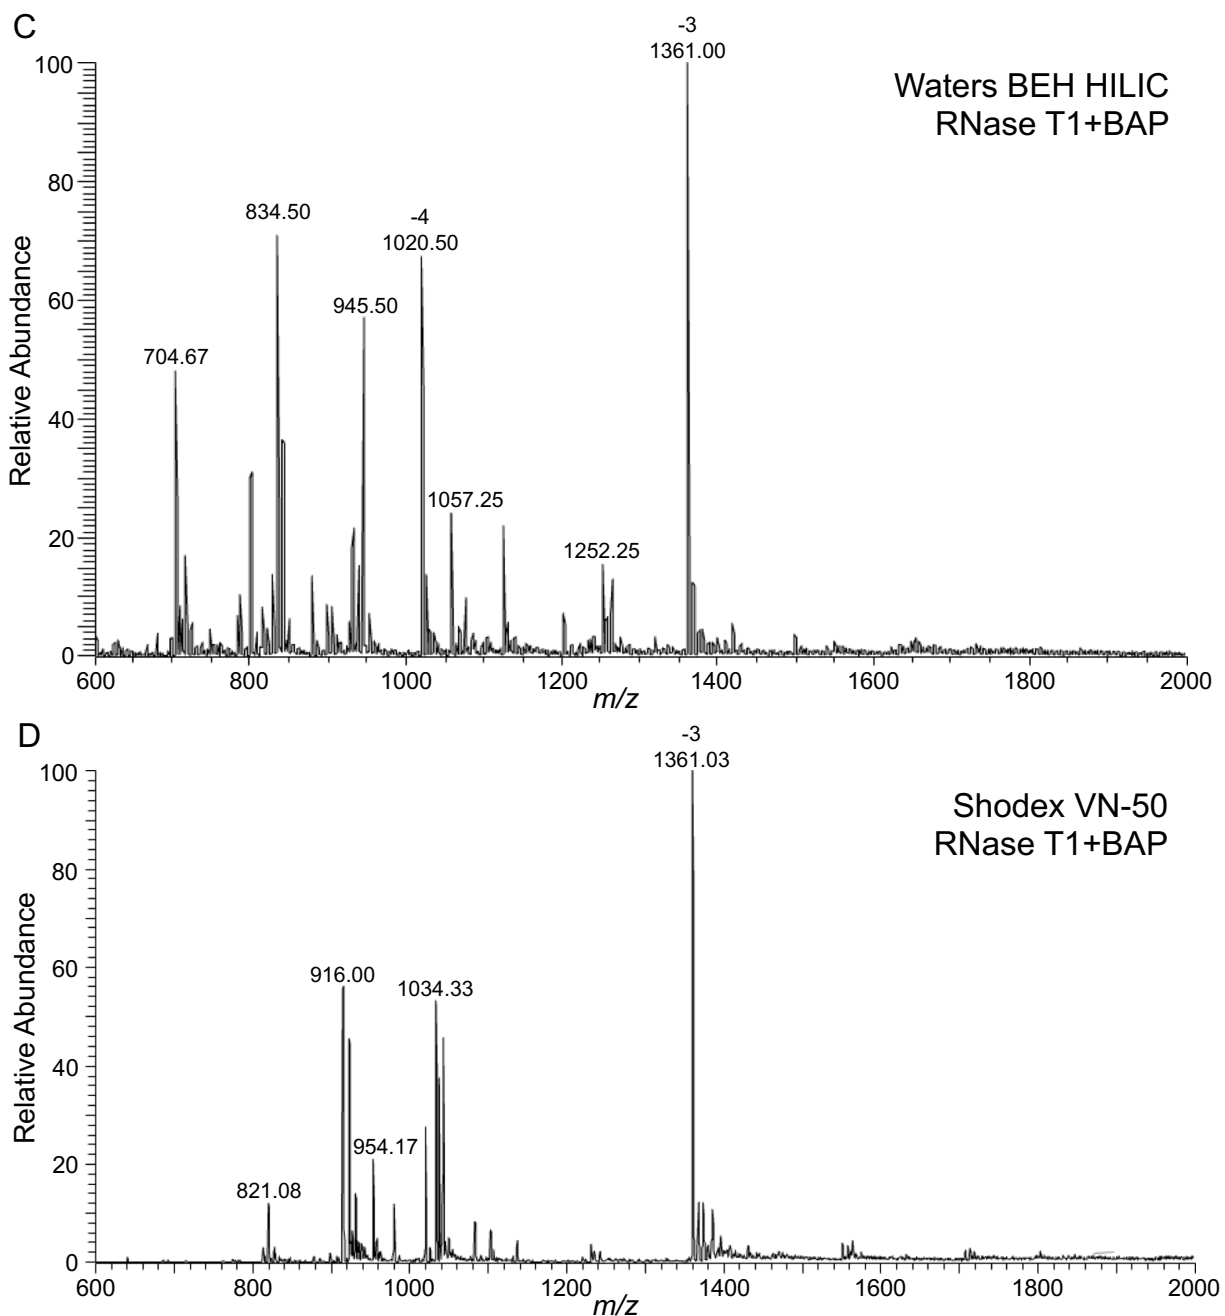

**Supplemental Figure S6.** Representative mass spectra for the oligonucleotide A[Cm]U[Gm]AA[yW]A[Ψ][m<sup>5</sup>C]UG(p) which is the largest RNase T1 digestion product from yeast tRNA-Phe. **(A)** Mass spectrum using the Waters BEH Amide column during RNase T1 digestion only. **(B)** Mass spectrum using the Shodex VN-50 column during RNase T1 digestion only. **(C)** Mass spectrum using the Waters BEH Amide column during RNase T1 and bacterial alkaline phosphatase (BAP) digestion. **(D)** Mass spectrum using the Shodex VN-50 column during RNase T1 and bacterial alkaline phosphatase (BAP) digestion. Addition of BAP apparently leads to significant salt adduction which negatively impacts the mass spectral results.
